# Supplementary material for: Antibody Immunity to Zika Virus among Young Children in a Flavivirus-Endemic Area in Nicaragua
Source: MDPI journal article supplement (doi:10.3390/v15030796), 2023-03-21

## Supplementary Material

Antibody immunity to Zika virus among young children in a flavivirus-endemic area in Nicaragua

**Supplementary Table S1. Information on suspected incident flavivirus cases**

| Study Code | ZIKV Infection Status           | Comment                                          |
|------------|---------------------------------|--------------------------------------------------|
| 1004       | No ZIKV infection               |                                                  |
|            |                                 |                                                  |
| 1023       | ZIKV immune                     |                                                  |
| 1027       | ZIKV immune                     |                                                  |
| 1116       | ZIKV infection during pregnancy | Mom ZIKV FRNT50 ↑ by >3-fold during pregnancy    |
| 1119       | ZIKV immune                     |                                                  |
| 1133       | -                               | Not included in study                            |
| 1143       | No ZIKV infection               |                                                  |
| 1154       | No ZIKV infection               |                                                  |
| 1163       | -                               | Not included in study                            |
| 1170       | ZIKV immune                     |                                                  |
| 1171       | -                               | Not included in study                            |
| 1180       | ZIKV immune                     |                                                  |
| 1191       | -                               | Not included in study                            |
| 1203       | ZIKV infection during pregnancy | Congenital infection confirmed by cord ZIKV IgM+ |
| 1219       | ZIKV immune                     |                                                  |
| 1225       | ZIKV immune                     |                                                  |
| 1235       | No ZIKV infection               |                                                  |
| 1237       | ZIKV immune                     |                                                  |

**Figure S1. ZIKV-neutralizing antibodies are detected in samples positive by ZIKV EDIII ELISA.** A-B) Kinetics of ZIKV-binding (A) and ZIKV-neutralizing (B) antibodies are shown over the first year of life for select ZIKV EDIII+ samples. Linked ELISA and eFRNT result are shown for each sample at birth (cord blood; C) and 3 months (D). ZIKV-neutralizing antibodies are consistently detected the same samples reactive by ZIKV EDIII ELISA, corroborating the interpretation of prior ZIKV infection in the mothers of these babies.

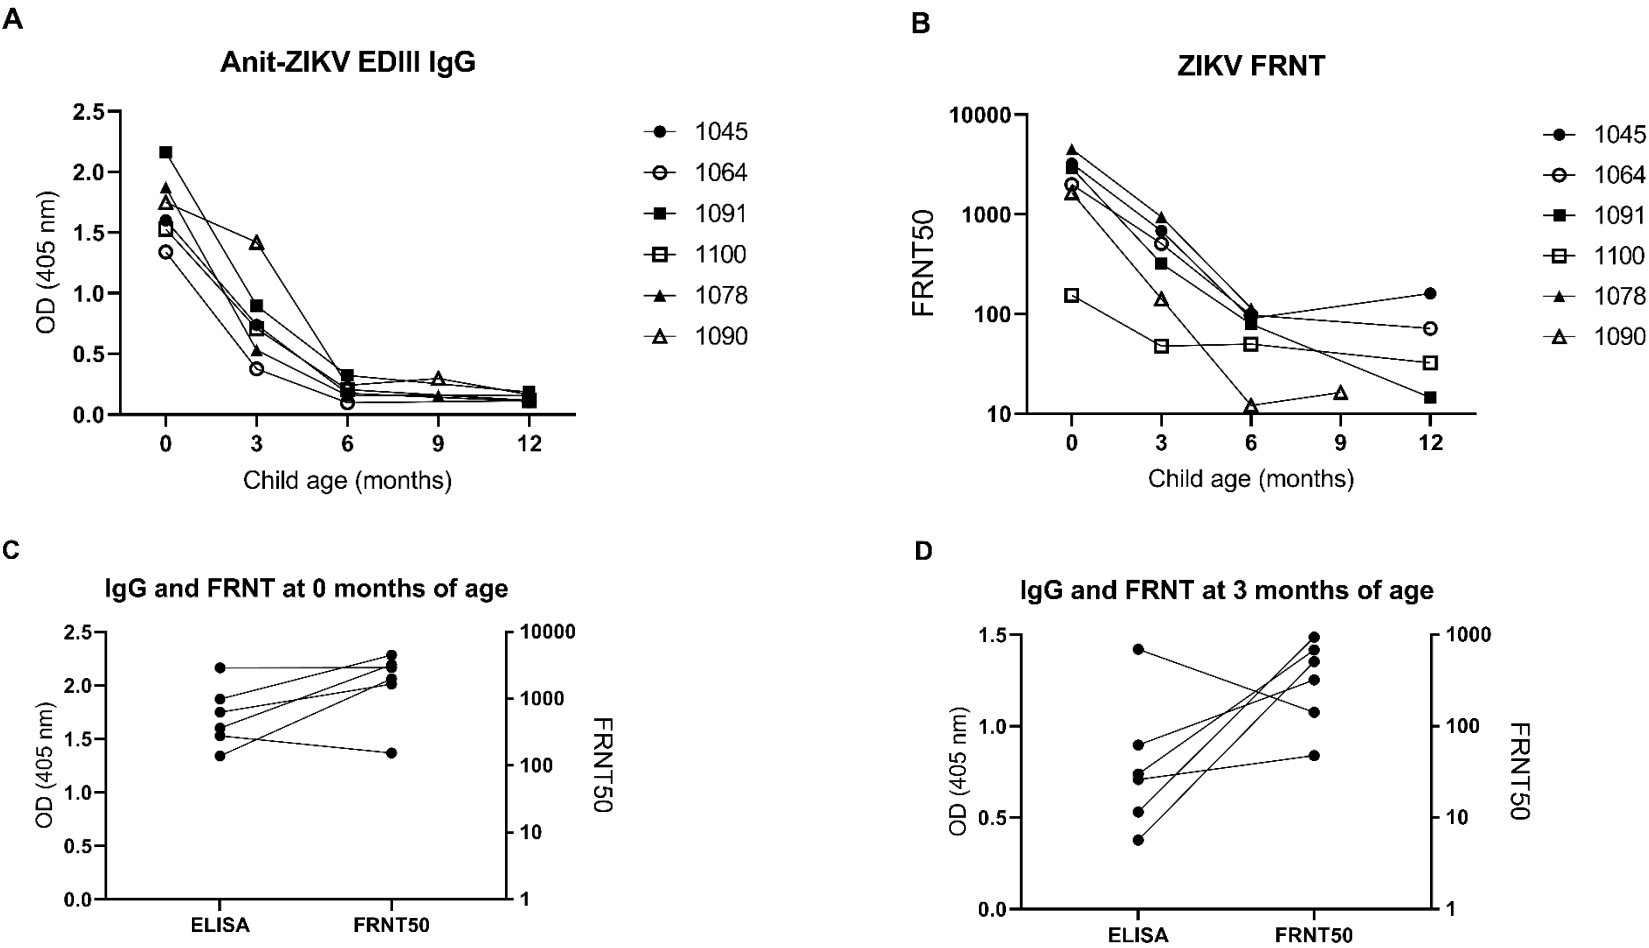

**Figure S2. Longitudinal ZIKV ELISA data for children with persistent or resurgent ZIKV IgG.** Raw optical density (OD) values are shown for longitudinal samples, grouped by participant code on x-axis with time points indicated by numerals (months of age, 0=cord blood), from children in PW1 cohort (A) and PW2 cohort (B). Samples with an increase of 0.5 OD are shown for PW1 and an increase of 0.3 OD for PW2. The lower threshold was used to select samples for further testing in PW2 because there were many fewer examples of suspected incident flavivirus infection. PW1 samples with an increase of 0.3 were noted but were not tested for neutralizing antibodies due to limited resources.

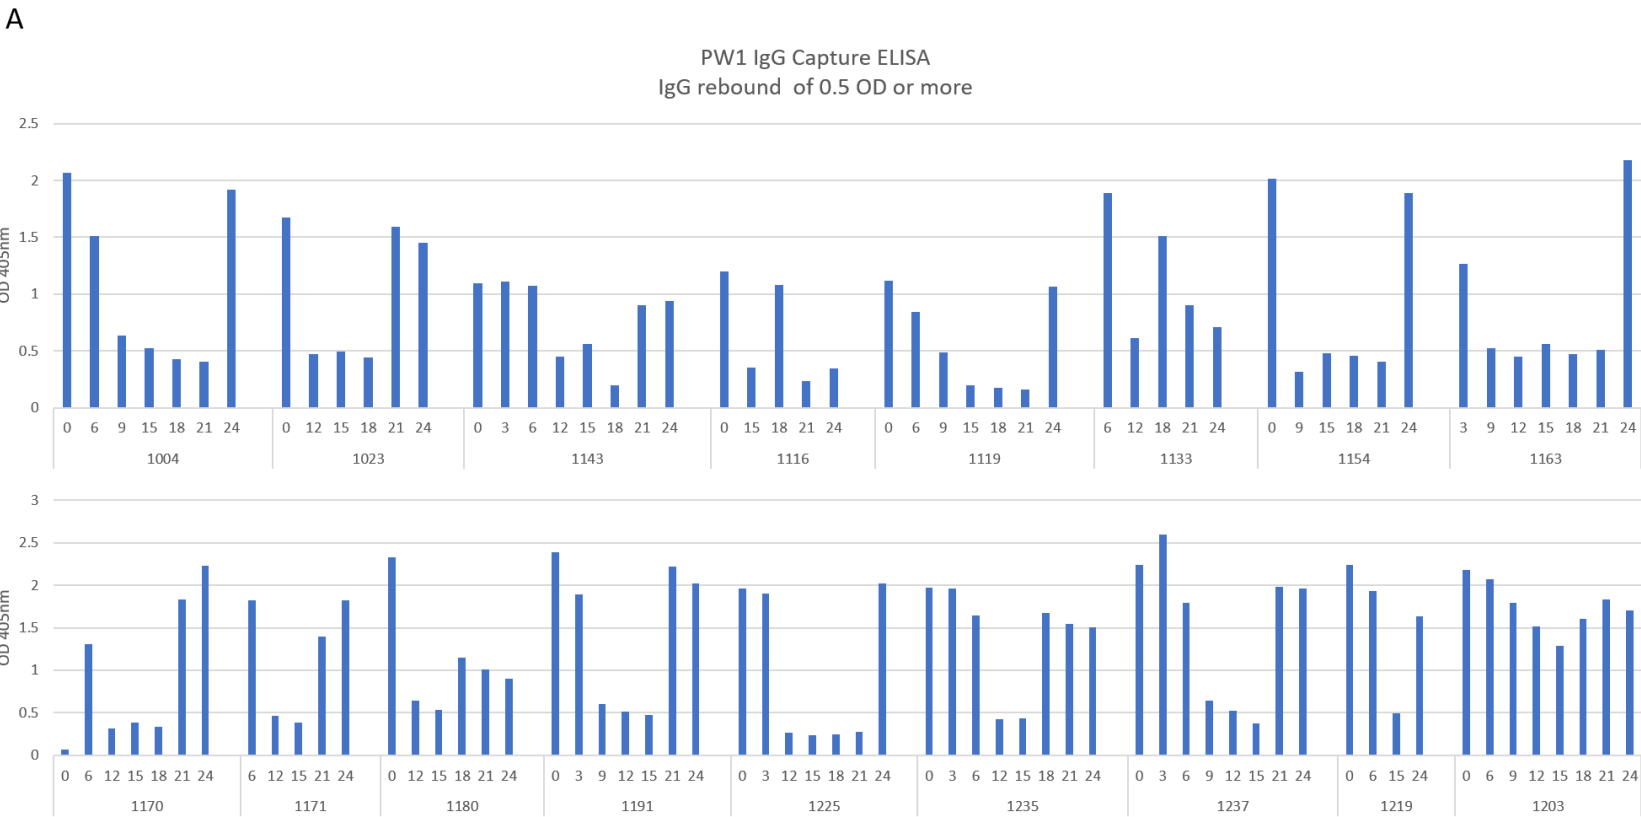

B

PW2 IgG Capture ELISA - IgG rebound of 0.3 OD or more

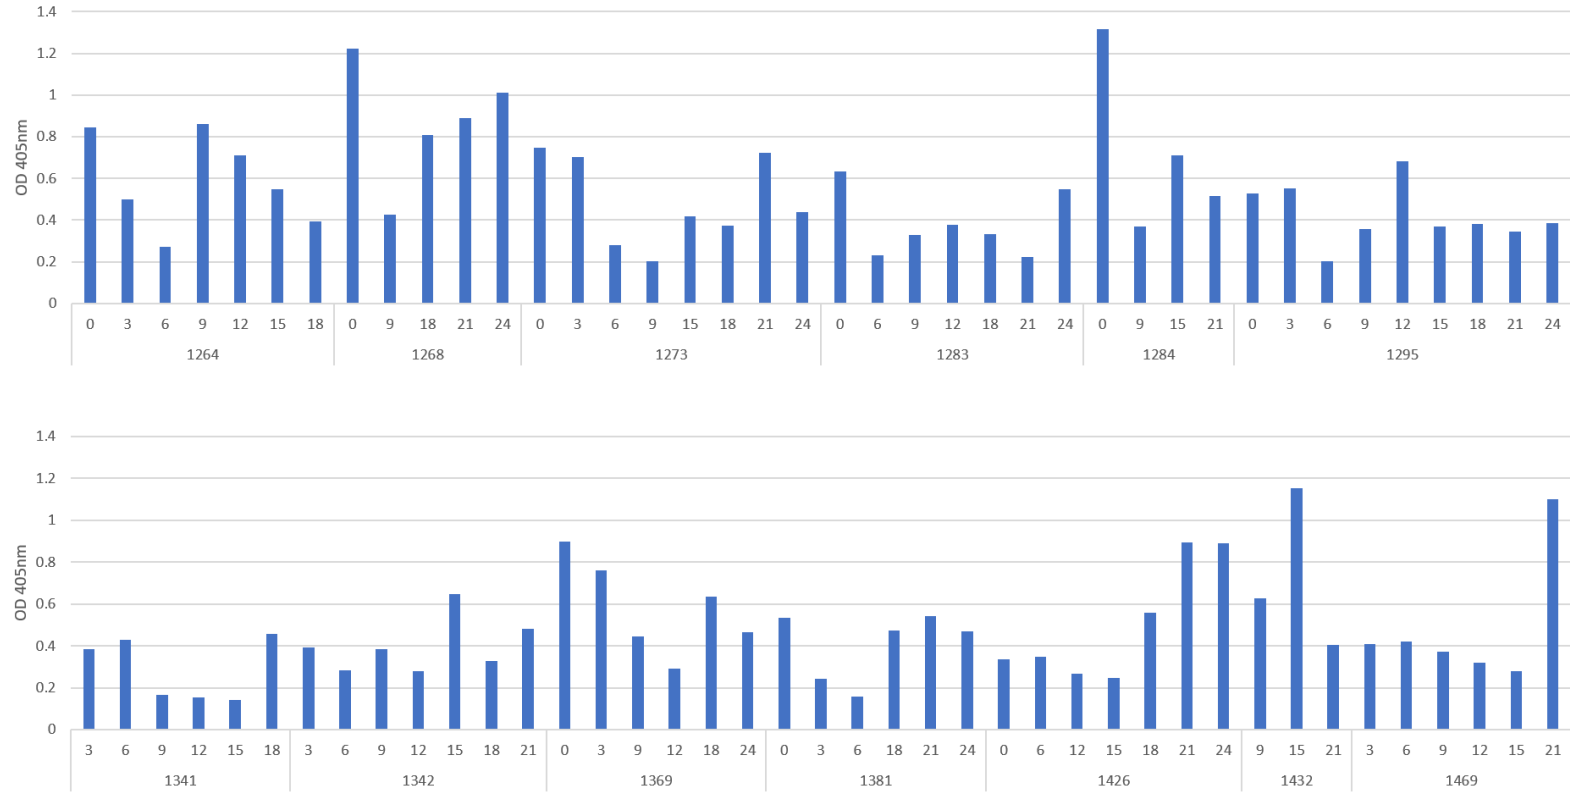

**Figure S3. Determination of infecting flavivirus by neutralizing antibody testing.** For the subset of samples identified by IgG ELISA, neutralizing antibody (NAb) titers were estimated by eFRNT at time points before and after the observed increase in OD (Figure S1). Raw data are shown consisting of focus staining for the indicated virus (ZIKV or DENV2) at the indicated time point for each sample. The dilution factor is shown at the left of each image (four 4-fold dilutions ranging 1:20 to 1:1280). Technical replicates were performed for all samples except for 1023, 12-3, 1119, and 1143, which were run in singleton.

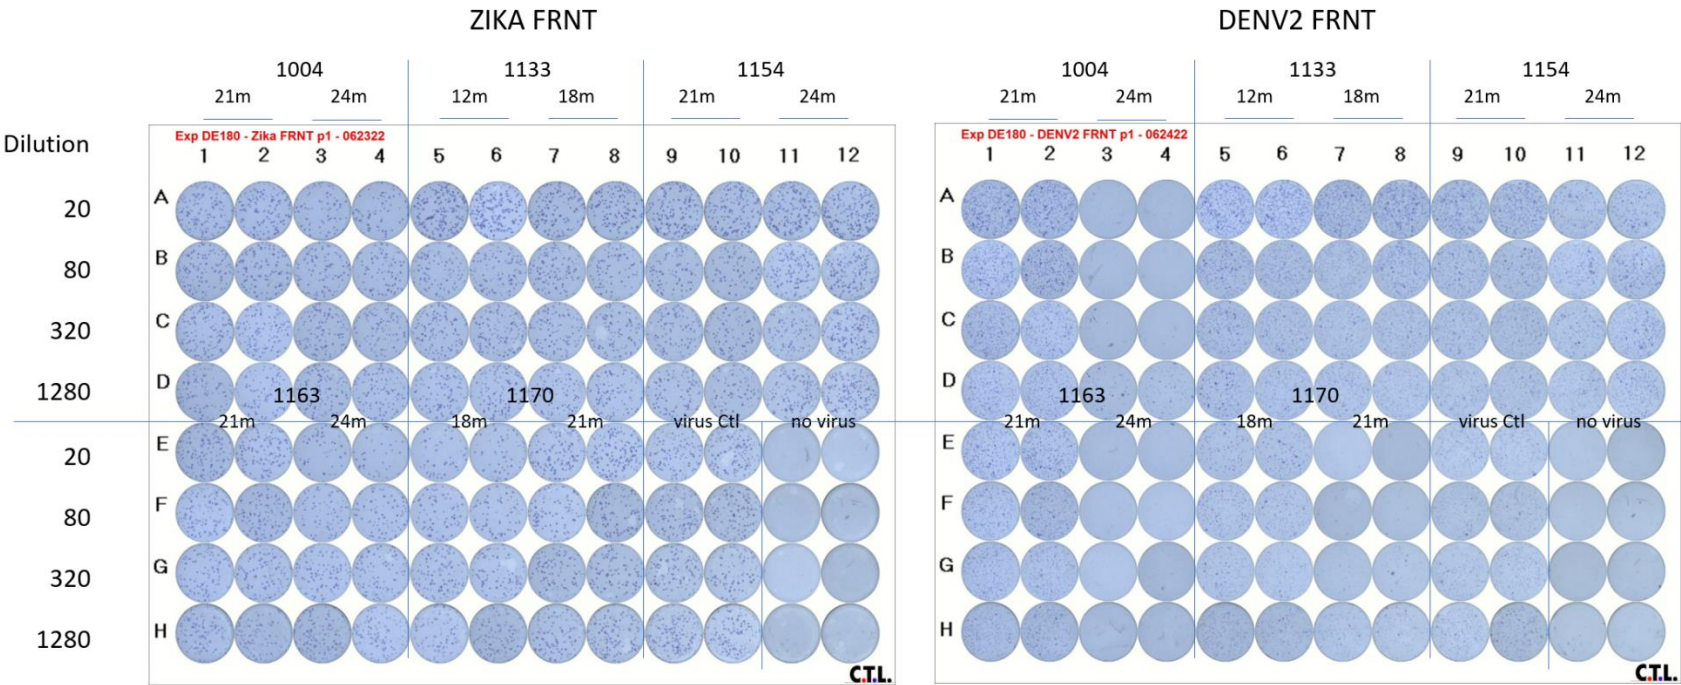

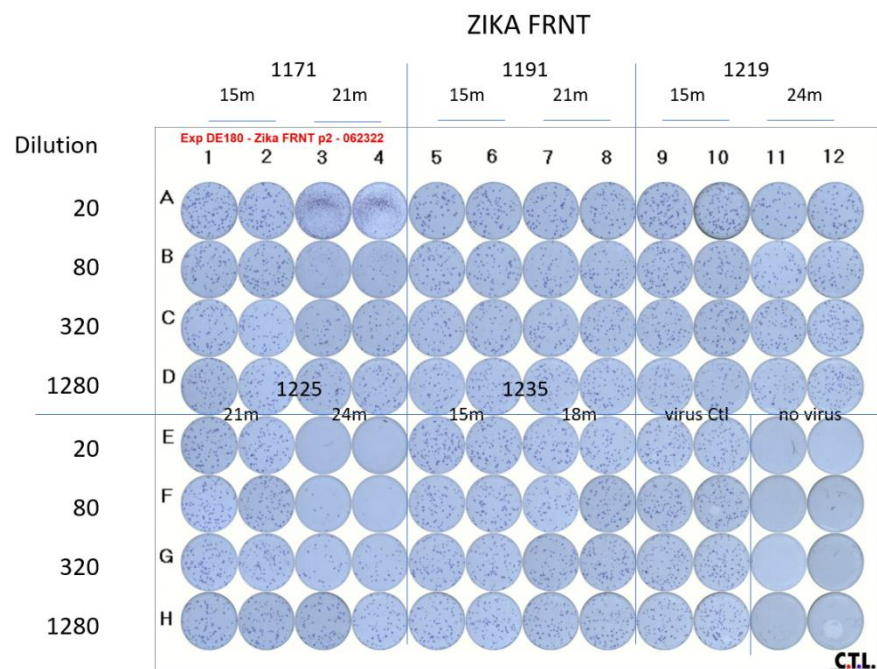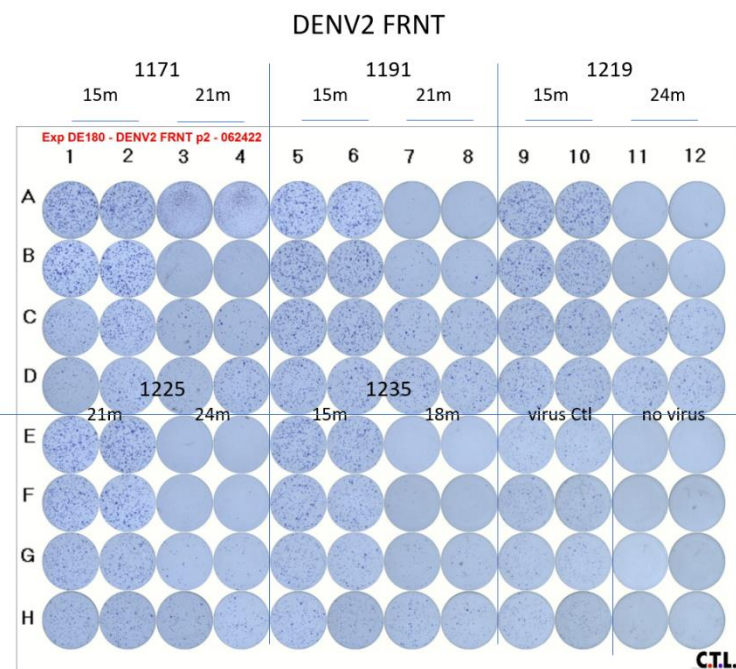



# ZIKA FRNT

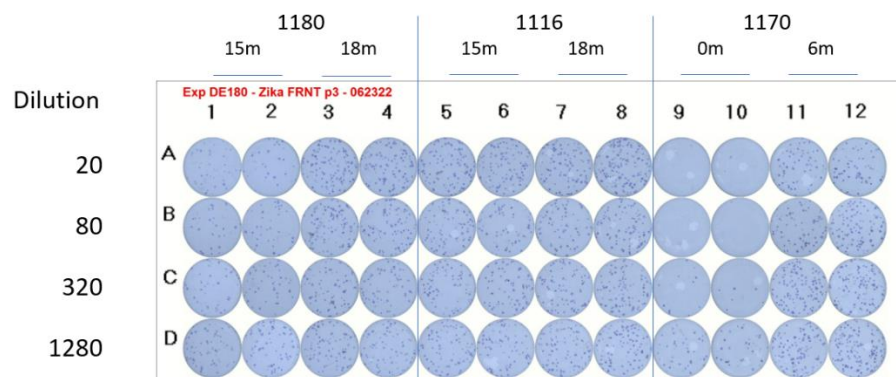

# DENV2 FRNT

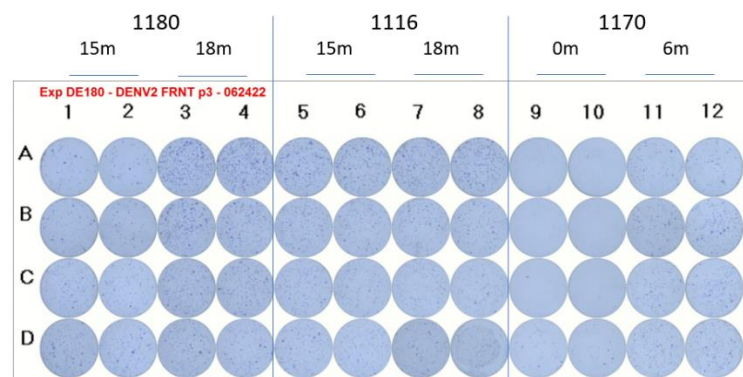

# ZIKA FRNT

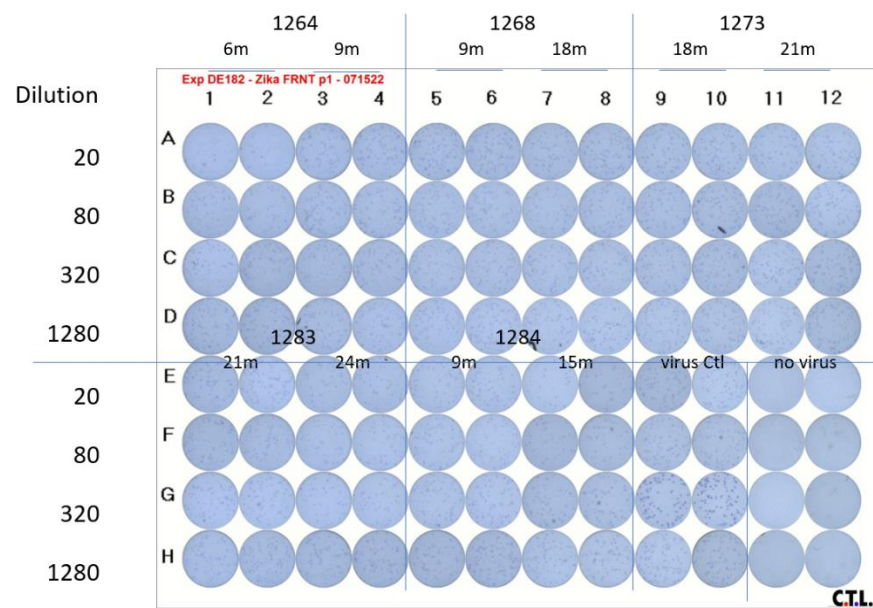

# DENV2 FRNT

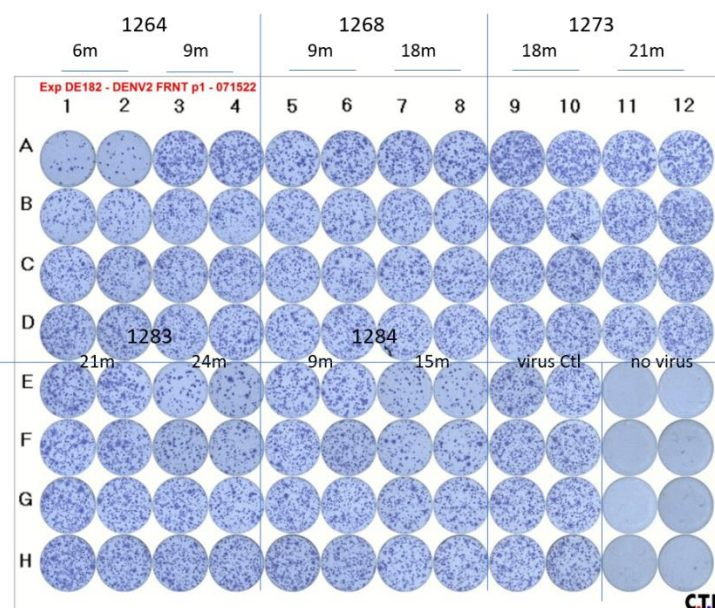

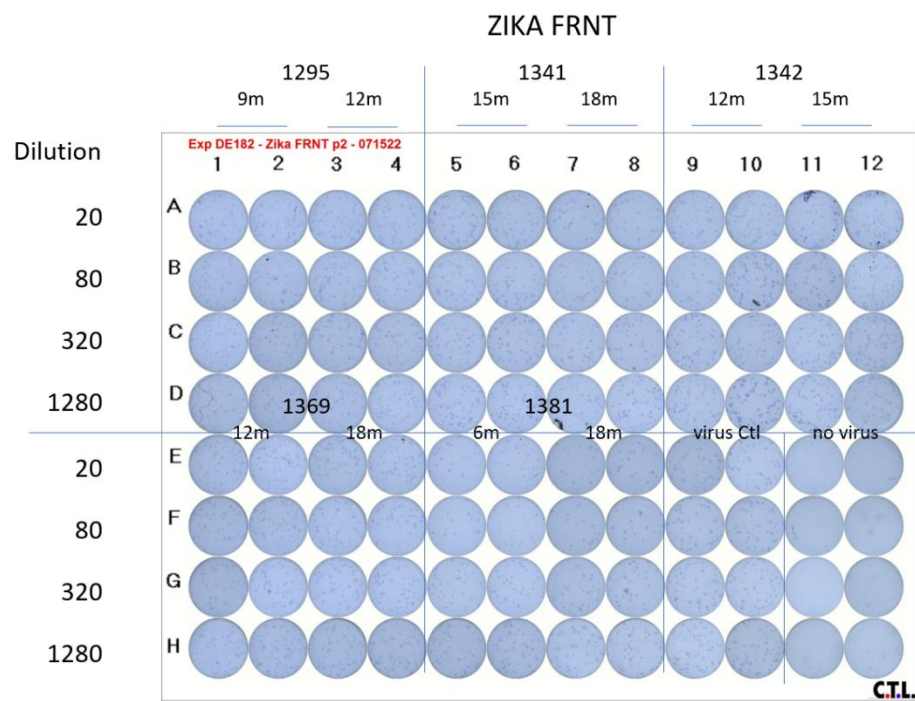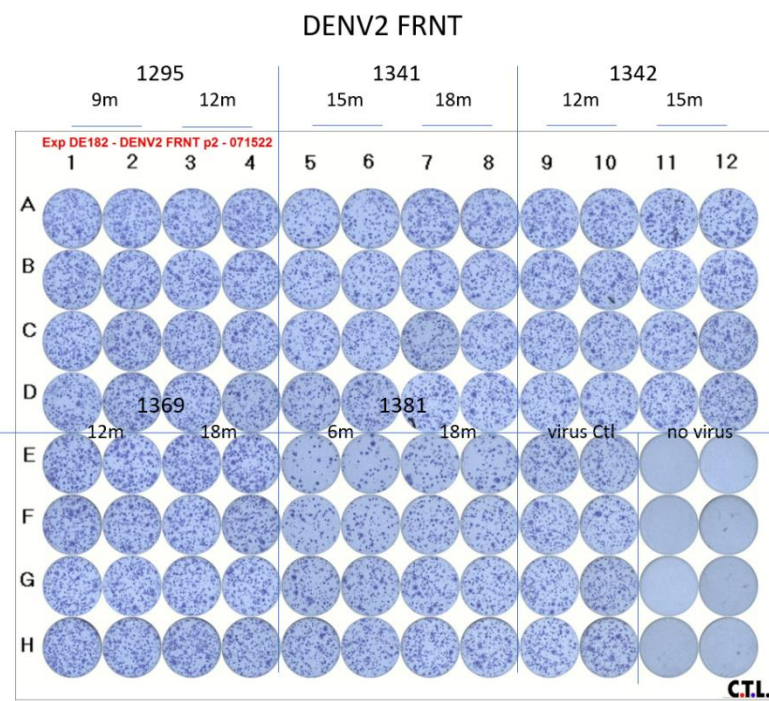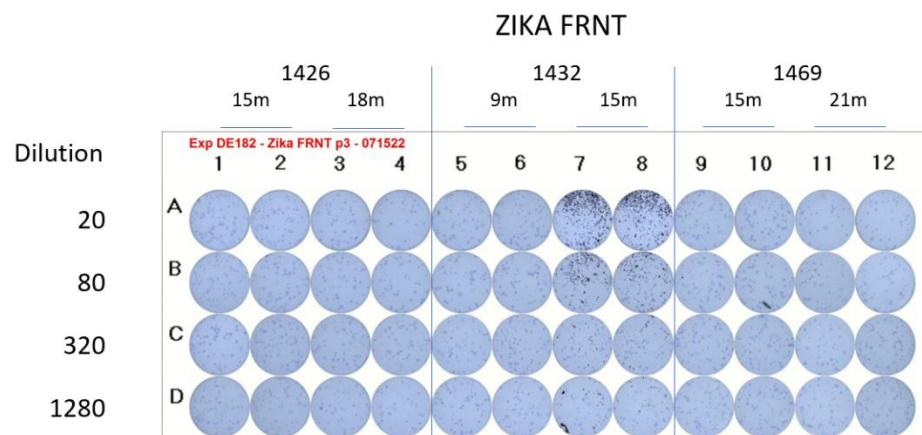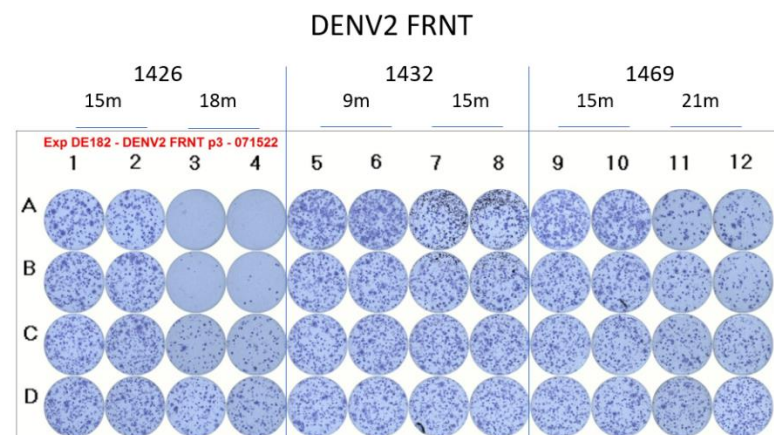



## ZIKA FRNT

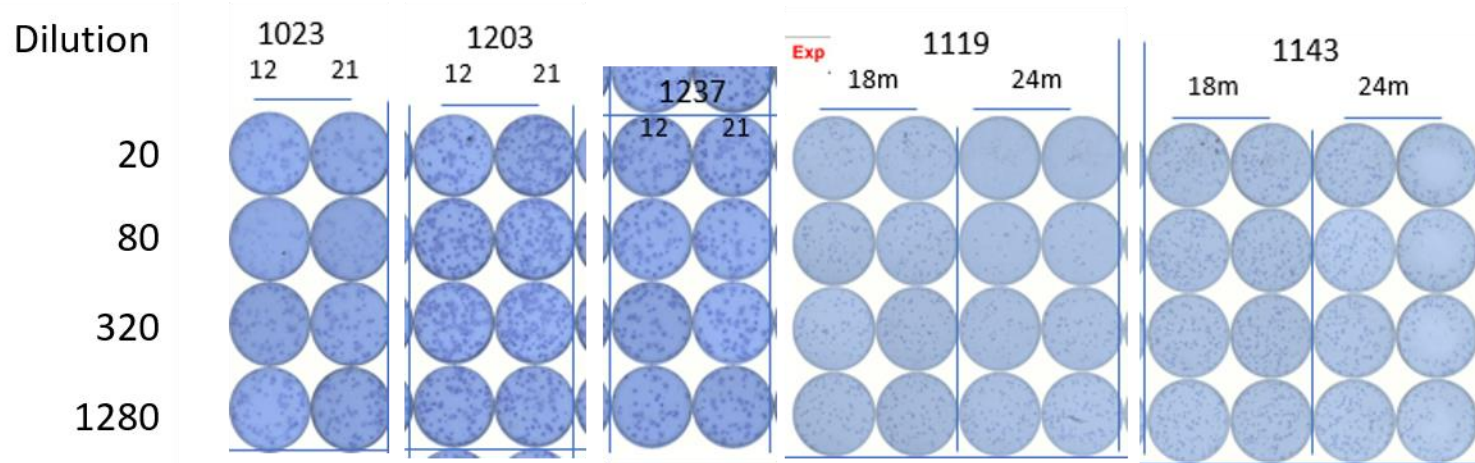

## DENV2 FRNT

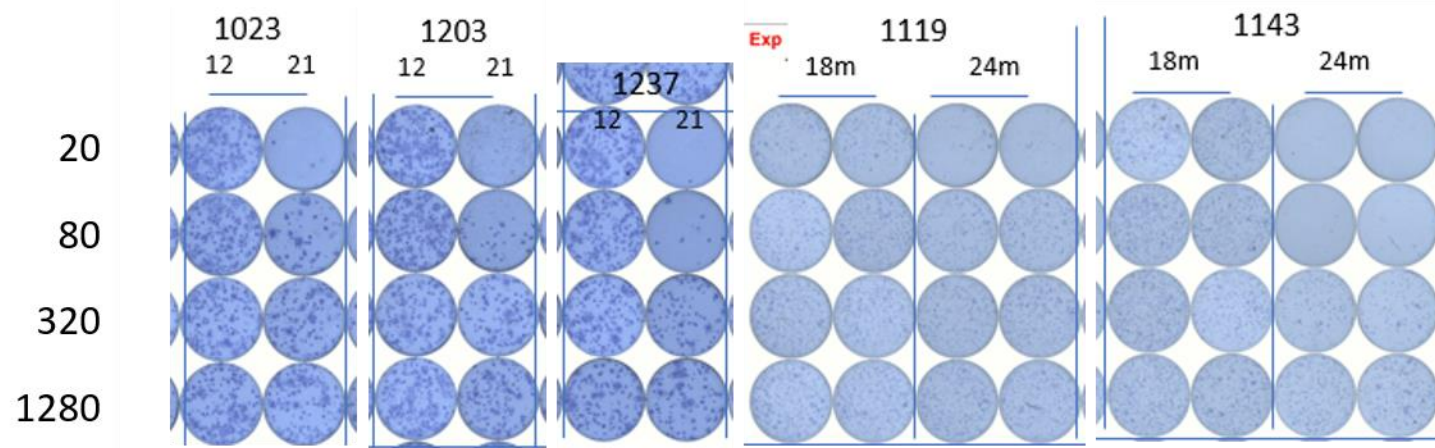

Supplement: s1 [file s1]
